# Supplementary material for: A FOXO1-dependent transcription network is a targetable vulnerability of mantle cell lymphomas
Source: PubMed Central journal article supplement (PMC9753996; doi:10.1172/jci160767), 2022-12-15
Supplement: jci-132-160767-s185.pdf [file jci-132-160767-s185.pdf]

**Supplemental Table 6. PK properties of cpd 10**

| Cpd 10 mouse PK |        |                                  |
|-----------------|--------|----------------------------------|
| IV (1 mg/kg)    | T1/2   | 1.23 h                           |
|                 | AUCinf | 1.86 $\mu\text{M}\cdot\text{h}$  |
|                 | Vss    | 1.71 L/kg                        |
|                 | CL     | 22.7 mL/kg $\cdot$ min           |
| IP (50 mg/kg)   | Tmax   | 0.58 h                           |
|                 | Cmax   | 2.18 $\mu\text{M}$               |
|                 | AUCinf | 17.61 $\mu\text{M}\cdot\text{h}$ |
|                 |        |                                  |

PK: pharmacokinetics. IV: intravenous. IP: Intraperitoneal. CL: clearance. Vss: steady state volume of distribution.
